# Supplementary material
Source: PubMed Central journal article supplement (PMC5554955)

# Figure S1

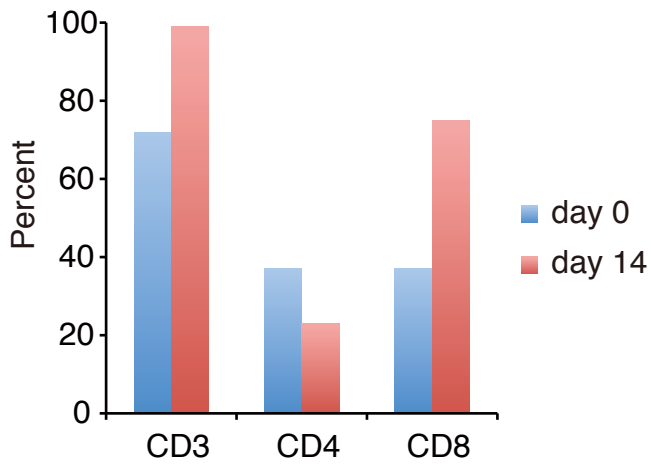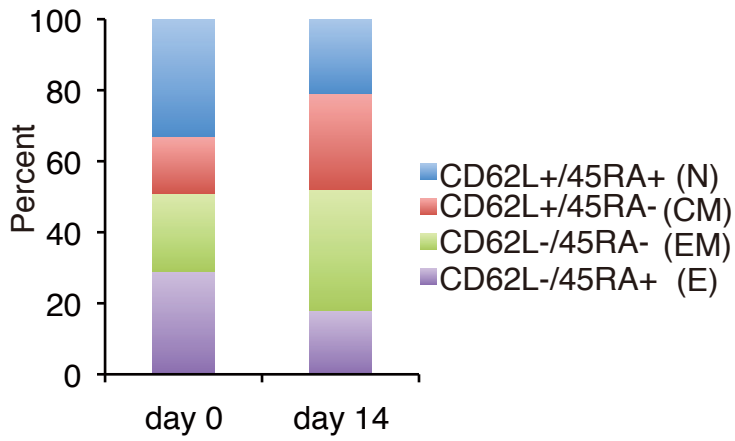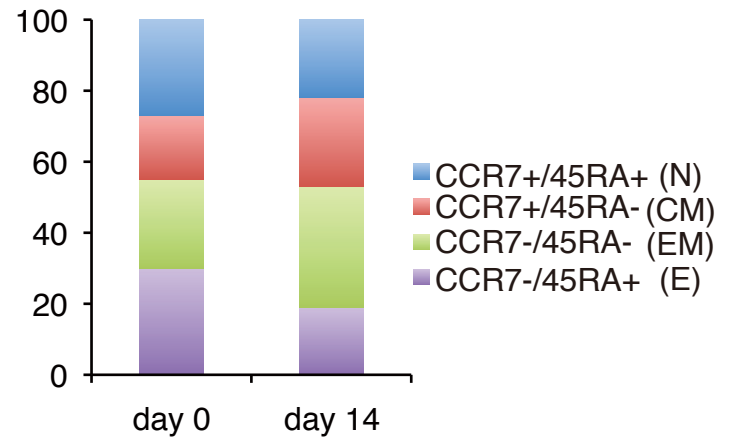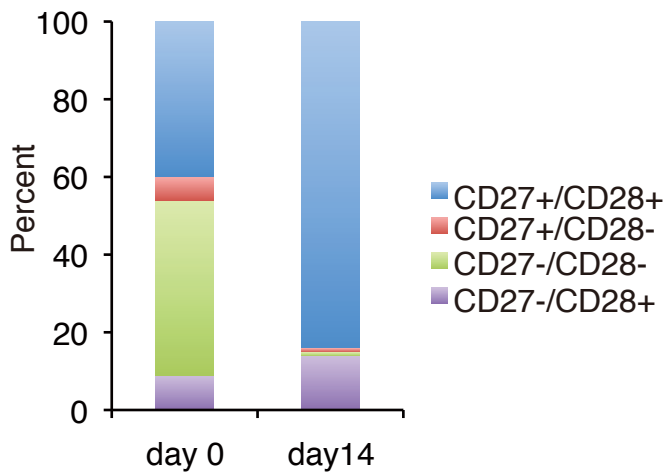

Supplement: NIHMS886549-supplement-S1.pdf [file NIHMS886549-supplement-S1.pdf]

Figure S3

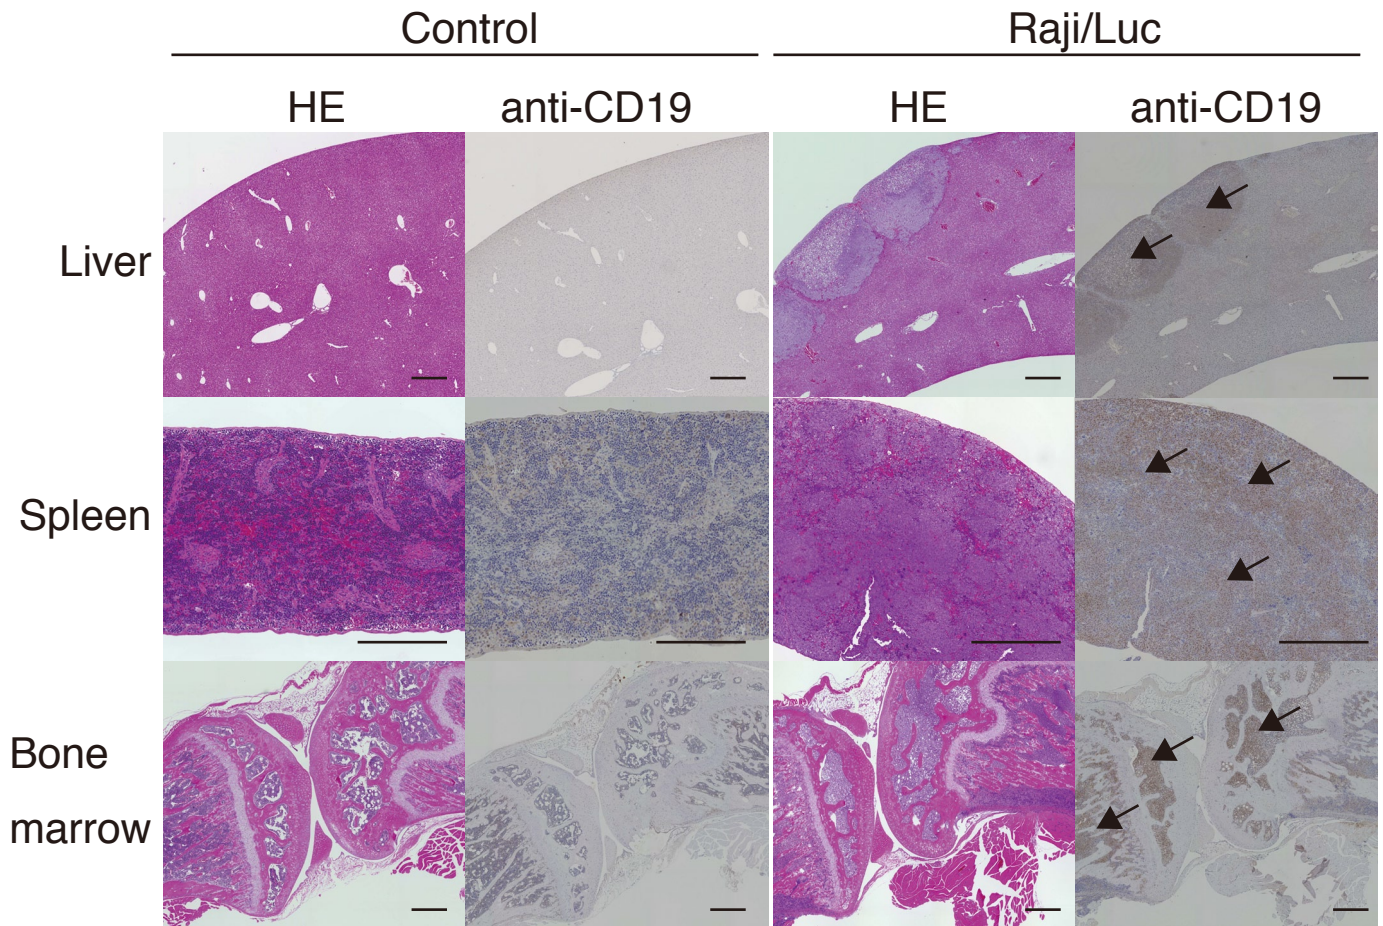

Supplement: NIHMS886549-supplement-S3.pdf [file NIHMS886549-supplement-S3.pdf]
